# Supplementary material
Source: HighWire-hosted journal article supplement (https://gut.bmj.com/content/66/4/716)
Supplement: inline-supplementary-material-1 [file inline-supplementary-material-1.pdf]

**Suppl. Fig. 1: Time course analysis of ConA-induced liver injury.**

WT and PGAM5<sup>-/-</sup> mice were treated with ConA (25mg/kg) for 2h, 4h, and 9h. (A) Plasma concentrations of AST/ALT (+SD, Group sizes  $\geq 3$ ). (B) Representative pictures of H&E staining (dashed line shows necrotic area). Scale bars = 200 $\mu$ m. (C) Representative pictures of TUNEL staining (red). Scale bars = 250 $\mu$ m.

**Suppl. Fig. 2: PGAM5 is not necessary for apoptotic liver injury.**

WT and PGAM5<sup>-/-</sup> mice were treated with anti-FAS (Jo2) antibody at a dose of 0.25  $\mu$ g/g of body weight for 6h. (A) Plasma concentrations of AST/ALT (group sizes, n=4). (B) Representative pictures of H&E staining. Insets show respective enlarged pictures. (C) Representative pictures and quantitative analysis of TUNEL staining (red). Scale bars: 250 $\mu$ m. (D) Representative pictures of cleaved caspase-3 staining (red). Statistical analysis showed the mean +SD, N.S.  $p > 0.05$ , \* $P \leq 0.05$ , \*\* $P \leq 0.01$ , \*\*\* $P \leq 0.001$ .

**Suppl. Fig. 3: Mdivi-1 pretreatment does not block ConA-induced infiltration of T-cells and neutrophils.**

(A) Representative pictures of immunofluorescence staining of MPO (upper panel) and CD4 (lower panel) in liver sections from mice treated as indicated for 7h. Scale bars: 100 $\mu$ m. (B) Quantification results (Group sizes: n=5). Statistical analysis showed the mean +SD, N.S.  $p > 0.05$ , \*\*\* $P \leq 0.001$ .

**Suppl. Fig. 4: Mdivi-1 is not additive to PGAM5 deficiency in protecting against ConA-induced liver injury.**

WT and PGAM5<sup>-/-</sup> mice were treated with ConA (25mg/kg) for 7h. For ConA+Mdivi-1, PGAM5<sup>-/-</sup> mice were intraperitoneally injected with Mdivi-1 (50 mg/kg) 30 mins before ConA treatment. (A) Plasma concentrations of AST/ALT (+SD, Group sizes: n=5,) (B) Representative pictures of H&E staining (dashed line shows necrotic area) and TUNEL (green). Scale bars: 100 $\mu$ m. (C) Quantitative analysis of TUNEL staining (green). Statistical analysis showed the mean +SD, N.S.  $p > 0.05$ , \* $P \leq 0.05$ , \*\* $P \leq 0.01$ , \*\*\* $P \leq 0.001$ .

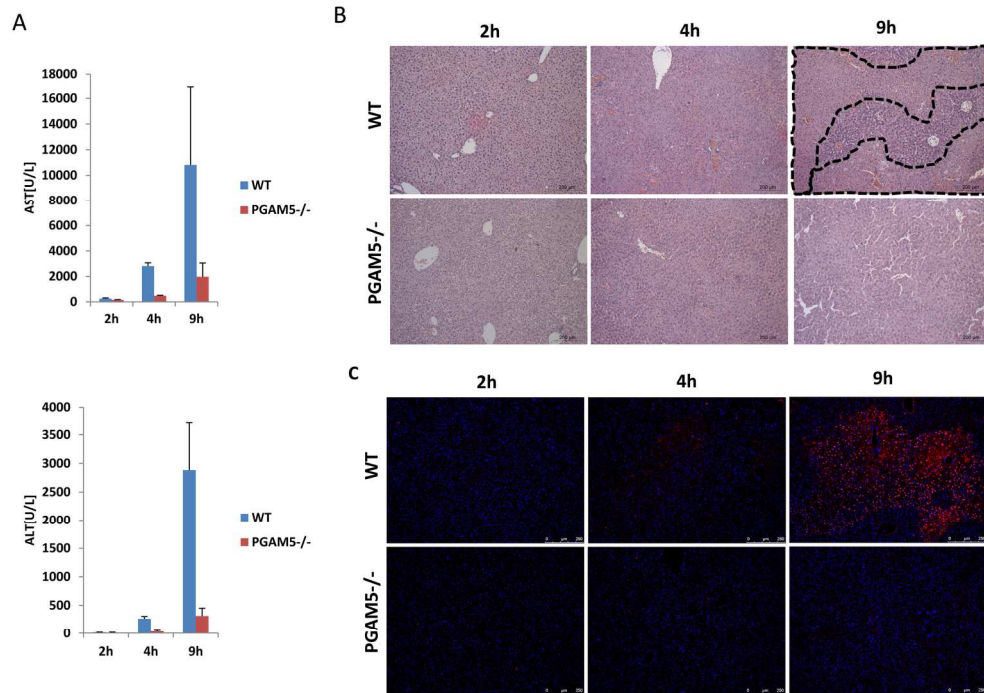

Suppl. Fig. 1

Suppl. Fig. 1

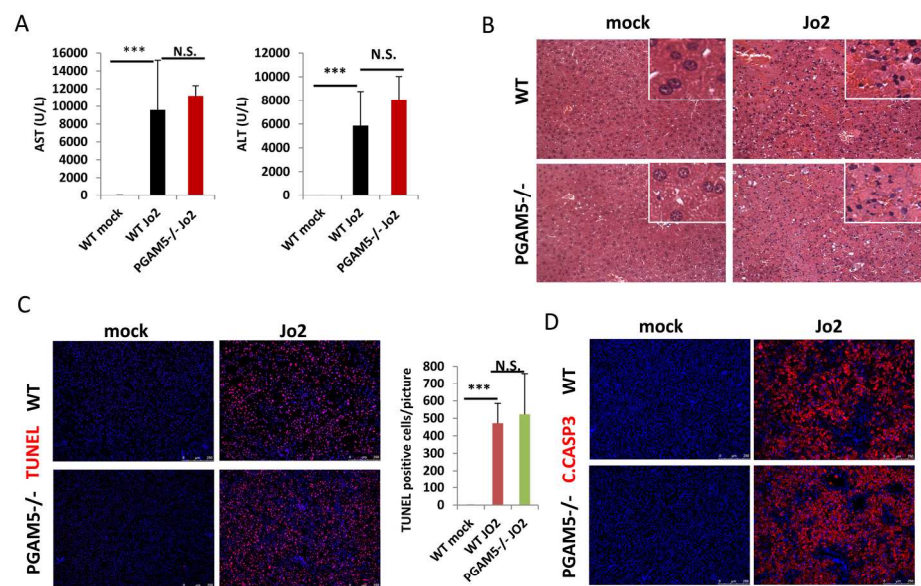

Suppl. Fig. 2

Suppl. Fig. 2

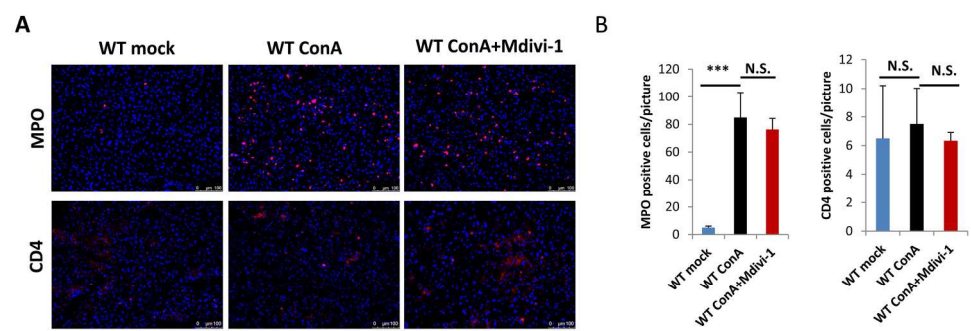

Suppl. Fig. 3

Suppl. Fig. 3

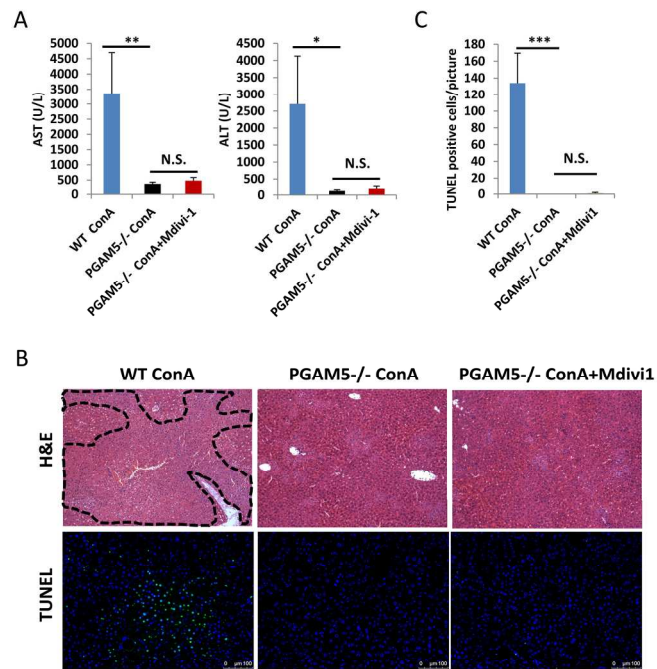

Suppl. Fig. 4

Suppl. Fig. 4
